# Supplementary material for: Side-by-Side Comparison of Commonly Used Biomolecules That Differ in Size and Affinity on Tumor Uptake and Internalization
Source: PLoS One. 2015 Apr 22;10(4):e0124440. doi: 10.1371/journal.pone.0124440 (PMC4406587; doi:10.1371/journal.pone.0124440)
Supplement: S3 Table — Two-way ANOVA was used to compare the %ID/g of different imaging agents to different tissues, followed by Bonferroni post-hoc test. ns = not significant, *p < 0.05, **p < 0.01 and ***p < 0.001, n = 3. Abbreviations and notations used: mIgG = control IgG; RIgG = R6.5 IgG; BSA = bovine serum albumin; Strep = streptavidin; mFab = control Fab; RFab = R6.5 Fab. (DOCX) [file pone.0124440.s003.docx]

**S3 Table. Two-way ANOVA of the data shown in Figure 4B**

| Tissue | mIgG (168h) vs. | mIgG vs. | | | | | RIgG vs. | | | | mFab vs. | | | RFab vs | | BSA vs. |
| --- | --- | --- | --- | --- | --- | --- | --- | --- | --- | --- | --- | --- | --- | --- | --- | --- |
| RIgG (168h) | RIgG | mFab | RFab | BSA | Strep | mFab | RFab | BSA | Strep | RFab | BSA | Strep | BSA | Strep | Strep |
| Tumor | ** | *** | *** | *** | * | ns | *** | *** | *** | *** | ns | * | * | ns | ns | ns |
| Lung | ns | ns | * | * | ns | ns | ** | ** | ns | * | ns | ns | ns | ns | ns | ns |
| Heart | ns | ns | ns | ns | ns | ns | ns | ns | ns | ns | ns | ns | ns | ns | ns | ns |
| Spleen | ns | ns | *** | *** | *** | *** | *** | *** | *** | *** | ns | ns | ns | ns | ns | ns |
| Kidney | ns | ns | *** | * | ns | *** | *** | * | ns | *** | ns | *** | ns | ** | ** | *** |
| Brain | ns | ns | ns | ns | ns | ns | ns | ns | ns | ns | ns | ns | ns | ns | ns | ns |
| Liver | ns | ns | *** | *** | ns | *** | *** | *** | ns | *** | ns | *** | ** | *** | ns | *** |
| Two-way ANOVA was used to compare the %ID/g of different imaging agents to different tissues, followed by Bonferroni post-hoc test. ns = not significant, *p < 0.05, **p < 0.01 and ***p < 0.001, n = 3. Abbreviations and notations used: mIgG = control IgG; RIgG = R6.5 IgG; BSA = bovine serum albumin; Strep = streptavidin; mFab = control Fab; RFab = R6.5 Fab | | | | | | | | | | | | | | | | |
